# Supplementary material for: Combination of Meropenem and Zinc Oxide Nanoparticles; Antimicrobial Synergism, Exaggerated Antibiofilm Activity, and Efficient Therapeutic Strategy against Bacterial Keratitis
Source: MDPI journal article supplement (doi:10.3390/antibiotics11101374), 2022-10-07
Supplement: s1 [file s1]

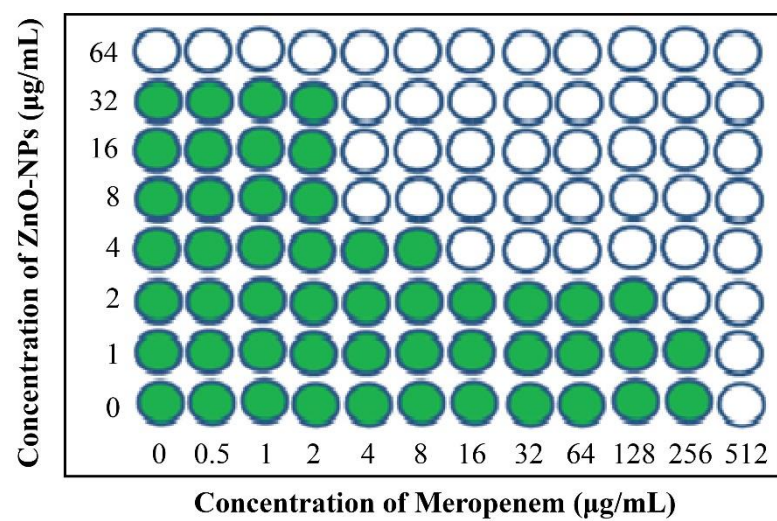

**Figure S1.** A schematic diagram of the distribution of meropenem and ZnO-NPs concentration in a 96-well plate

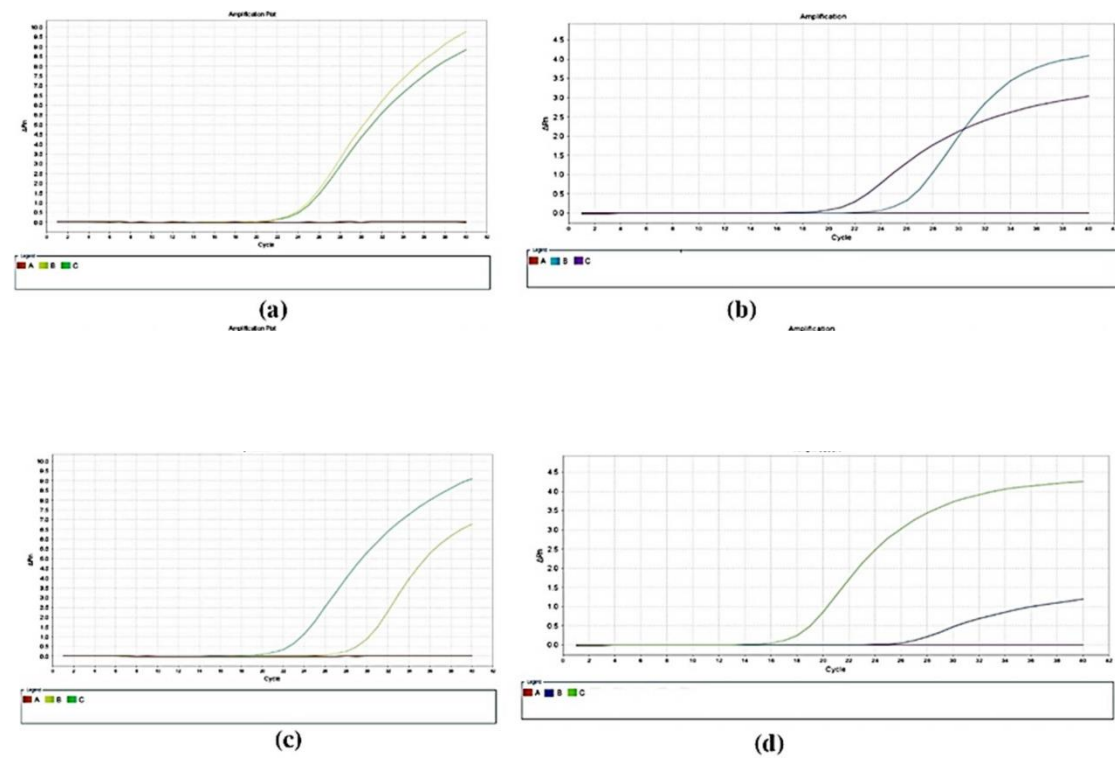

**Figure S2.** Data sheet of RT-PCR showing amplification curves of (a) 16S rRNA structural genes and biofilm genes (b) *fliC*, (c) *lasR* and (d) *psIA* of carbapenem-resistant *P. aeruginosa* PU15.
